# Supplementary material
Source: ML conference proceedings conference paper supplement (https://proceedings.neurips.cc/paper_files/paper/2012/hash/202cb962ac59075b964b07152d234b70-Abstract.html)
Supplement: Supplementary file 1 [file 202cb962ac59075b964b07152d234b70-Supplemental.zip]

Archive with 1 entries (1 files):
- supplementary.pdf
